# Supplementary material for: Assessment of the inter-platform reproducibility of ultrasound attenuation examination in nonalcoholic fatty liver disease
Source: PubMed Central journal article supplement — Ultrasonography. 2021 Oct 31;41(2):355–64. doi: 10.14366/usg.21167 (PMC8942738; doi:10.14366/usg.21167), 2021-10-31
Supplement: usg-21167-supple.pdf [file usg-21167-supple.pdf]

**Supplementary Table 1.** Inter-platform reproducibility of AC values between three ultrasound attenuation examination platforms according to visual grade of hepatic steatosis

| Visual grade of steatosis           | Mean bias (dB/cm/MHz)  | BALA (dB/cm/MHz) | ICC                     | CV (%)             | Pearson r               |
|-------------------------------------|------------------------|------------------|-------------------------|--------------------|-------------------------|
| No or mild steatosis (n=21)         |                        |                  |                         |                    |                         |
| ATI vs. TAI                         | -0.06 (-0.10 to -0.01) | -0.24 to 0.13    | 0.376 (-0.278 to 0.724) | 11.3 (9.3 to 12.9) | 0.303 (-0.148 to 0.650) |
| ATI vs. UGAP                        | -0.01 (-0.05 to 0.03)  | -0.19 to 0.18    | 0.522 (-0.208 to 0.809) | 9.5 (7.1 to 11.5)  | 0.354 (-0.092 to 0.681) |
| TAI vs. UGAP                        | 0.05 (0.02 to 0.08)    | -0.07 to 0.17    | 0.643 (0.025 to 0.863)  | 8.1 (4.2 to 10.7)  | 0.593 (0.217 to 0.816)  |
| Moderate to severe steatosis (n=25) |                        |                  |                         |                    |                         |
| ATI vs. TAI                         | -0.05 (-0.08 to 0.02)  | -0.20 to 0.10    | 0.763 (0.351 to 0.905)  | 7.6 (4.9 to 9.6)   | 0.697 (0.416 to 0.856)  |
| ATI vs. UGAP                        | 0.02 (-0.01 to 0.05)   | -0.14 to 0.18    | 0.658 (0.239 to 0.848)  | 7.1 (5.1 to 8.6)   | 0.521 (0.158 to 0.760)  |
| TAI vs. UGAP                        | 0.07 (0.04 to 0.10)    | -0.07 to 0.22    | 0.633 (-0.045 to 0.857) | 8.3 (5.7 to 10.3)  | 0.659 (0.356 to 0.836)  |

Numbers in parentheses are 95% confidence intervals.

AC, attenuation coefficient; ATI, Attenuation Imaging; TAI, Tissue Attenuation Imaging; UGAP, Ultrasound-Guided Attenuation Parameter; BALA, Bland-Altman 95% limits of agreement; ICC, intraclass correlation coefficient; CV, coefficient of variation.

**Supplementary Table 2.** AC values obtained using different ultrasound attenuation examination platforms according to number of acquisitions

| No. of acquisitions | AC values (mean±SD) (dB/cm/MHz) |           |           | ICC (95% CI)           |                        |                        | CV (95% CI, %)        |                      |                      |
|---------------------|---------------------------------|-----------|-----------|------------------------|------------------------|------------------------|-----------------------|----------------------|----------------------|
|                     | ATI                             | TAI       | UGAP      | ATI vs. TAI            | ATI vs. UGAP           | TAI vs. UGAP           | ATI vs. TAI           | ATI vs. UGAP         | TAI vs. UGAP         |
| 1                   | 0.75±0.12                       | 0.80±0.11 | 0.74±0.09 | 0.716<br>(0.446–0.849) | 0.713<br>(0.486–0.841) | 0.772<br>(0.083–0.915) | 10.57<br>(8.45–12.34) | 9.46<br>(7.37–11.16) | 8.67<br>(6.91–10.13) |
| 2                   | 0.75±0.12                       | 0.80±0.11 | 0.74±0.09 | 0.772<br>(0.518–0.884) | 0.738<br>(0.528–0.855) | 0.776<br>(0.218–0.911) | 9.66<br>(7.85–11.17)  | 8.99<br>(7.16–10.50) | 8.18<br>(6.16–9.79)  |
| 3                   | 0.75±0.12                       | 0.80±0.11 | 0.74±0.09 | 0.788<br>(0.511–0.897) | 0.756<br>(0.559–0.865) | 0.774<br>(0.229–0.909) | 9.49<br>(7.92–10.83)  | 8.71<br>(7.12–10.05) | 8.38<br>(6.35–10.00) |
| 4                   | 0.75±0.12                       | 0.80±0.11 | 0.74±0.09 | 0.790<br>(0.507–0.898) | 0.780<br>(0.603–0.878) | 0.782<br>(0.256–0.912) | 9.51<br>(7.95–10.85)  | 8.43<br>(6.90–9.72)  | 8.24<br>(6.22–9.85)  |
| 5                   | 0.75±0.12                       | 0.80±0.11 | 0.74±0.09 | 0.795<br>(0.491–0.903) | 0.791<br>(0.622–0.885) | 0.789<br>(0.265–0.915) | 9.47<br>(7.91–10.80)  | 8.27<br>(6.79–9.54)  | 8.23<br>(6.26–9.82)  |

AC, attenuation coefficient; SD, standard deviation; ICC, intraclass correlation coefficient; CI, confidence interval; CV, coefficient of variation; ATI, Attenuation Imaging; TAI, Tissue Attenuation Imaging; UGAP, Ultrasound-Guided Attenuation Parameter.
